# Supplementary material
Source: PubMed Central journal article supplement (PMC4038962)
Supplement: NIHMS148691-supplement-03.pdf [file NIHMS148691-supplement-03.pdf]

## A Unbiased Cosmopolitan

| Isolate              | GTPP03  | GTC A29            | GT2                           | GT7                         | GTME20                        | GTM R01                       | AFNFA4                               | GTC A08                               | AFNFA3                               | GTC N16                             | GTC A04                                       | GTC A28                                                                   |
|----------------------|---------|--------------------|-------------------------------|-----------------------------|-------------------------------|-------------------------------|--------------------------------------|---------------------------------------|--------------------------------------|-------------------------------------|-----------------------------------------------|---------------------------------------------------------------------------|
| Positive co-cultures | GTC A28 | GTC A08<br>GTM R01 | GTC A04<br>GTC A28<br>GTC N16 | AFNFA3<br>AFNFA4<br>GTC A28 | GTC A04<br>GTC A08<br>GTC N16 | GTC A04<br>GTC A29<br>GTC N16 | GT7<br>GTC A04<br>GTC A08<br>GTC A28 | AFNFA3<br>AFNFA4<br>GTC A29<br>GTME20 | GT7<br>GTC A08<br>GTC A28<br>GTC N16 | AFNFA3<br>GT2<br>GTC A28<br>GTM R01 | AFNFA3<br>AFNFA4<br>GT2<br>GTC A28<br>GTM R01 | AFNFA3<br>AFNFA4<br>GT2<br>GT7<br>GTC A04<br>GTC N16<br>GTM E20<br>GTPP03 |

## B Biased Cosmopolitan

| Isolate              | ATSP1-A  | ATSP1-C            | SP4E3-1                      | ATSW01-1                                              | GT7                                     | GTLI21                                                       | SP4B5-2                                    | ATSP1-B                                                    | ATSP1-D                                | 38-3                                                                    | GTC A28                                                              | ATRU03                                                                                        | GTC N16                                                                            | GTM253-17                                                                           | SP4B6-2                                                                      |
|----------------------|----------|--------------------|------------------------------|-------------------------------------------------------|-----------------------------------------|--------------------------------------------------------------|--------------------------------------------|------------------------------------------------------------|----------------------------------------|-------------------------------------------------------------------------|----------------------------------------------------------------------|-----------------------------------------------------------------------------------------------|------------------------------------------------------------------------------------|-------------------------------------------------------------------------------------|------------------------------------------------------------------------------|
| Positive co-cultures | ATSW01-1 | GTC A28<br>SP4B6-2 | ATRU03<br>SP4B5-2<br>SP4B6-2 | GTC N16<br>GTM253-17<br>ATSP1-A<br>ATSP1-B<br>SP4B6-2 | ATRU03<br>GTC A28<br>ATSP1-D<br>SP4B6-2 | 38-3<br>ATRU03<br>GTM253-17<br>ATSP1-D<br>ATSP1-B<br>SP4B6-2 | GTC N16<br>GTM253-17<br>ATSP1-D<br>SP4B6-2 | 38-3<br>ATRU03<br>GTC A28<br>GTC N16<br>GTLI21<br>ATSW01-1 | GT7<br>GTC N16<br>GTM253-17<br>SP4B6-2 | 38-3<br>ATRU03<br>GTC N16<br>GTM253-17<br>ATSP1-B<br>ATSP1-D<br>SP4B6-2 | ATRU03<br>GT7<br>GTC A28<br>GTC N16<br>ATSP1-B<br>ATSP1-C<br>SP4B6-2 | 38-3<br>ATRU03<br>GTC A28<br>GTC N16<br>GTM253-17<br>ATSP1-B<br>ATSP1-D<br>SP4B6-2<br>SP4E3-1 | 38-3<br>ATRU03<br>GTC A28<br>GTC N16<br>GTM253-17<br>ATSP1-B<br>ATSP1-D<br>SP4B6-2 | 38-3<br>ATRU03<br>GTC A28<br>GTC N16<br>GTM253-17<br>ATSP1-D<br>ATSW01-1<br>SP4B6-2 | 38-3<br>ATRU03<br>GT7<br>GTC A28<br>GTC N16<br>GTLI21<br>ATSP1-D<br>ATSW01-1 |

## C Unbiased Belfast

| Isolate              | UW450 | UW459 | UW460 | UW474 | UW485 | UW451                   | UW453                   | UW480                   | UW486                   | UW452                            | UW475                            | UW484                            |
|----------------------|-------|-------|-------|-------|-------|-------------------------|-------------------------|-------------------------|-------------------------|----------------------------------|----------------------------------|----------------------------------|
| Positive co-cultures |       |       |       |       |       | UW452<br>UW475<br>UW484 | UW452<br>UW475<br>UW484 | UW452<br>UW475<br>UW484 | UW452<br>UW475<br>UW484 | UW451<br>UW453<br>UW480<br>UW486 | UW451<br>UW453<br>UW480<br>UW486 | UW451<br>UW453<br>UW480<br>UW486 |

## D Biased Belfast

| Isolate              | UW464 | UW485 | UW499 | UW455          | UW456          | UW500 | UW480          | UW504          | UW473                   | UW484                   | UW466                                     | UW462                            | UW468                            | UW465                                              | UW475                                                                                  |
|----------------------|-------|-------|-------|----------------|----------------|-------|----------------|----------------|-------------------------|-------------------------|-------------------------------------------|----------------------------------|----------------------------------|----------------------------------------------------|----------------------------------------------------------------------------------------|
| Positive co-cultures |       |       |       | UW475<br>UW475 | UW475<br>UW465 |       | UW475<br>UW484 | UW466<br>UW475 | UW462<br>UW465<br>UW468 | UW465<br>UW468<br>UW480 | UW462<br>UW465<br>UW466<br>UW468<br>UW504 | UW465<br>UW466<br>UW473<br>UW475 | UW466<br>UW468<br>UW475<br>UW484 | UW462<br>UW465<br>UW466<br>UW475<br>UW480<br>UW484 | UW455<br>UW456<br>UW462<br>UW465<br>UW466<br>UW475<br>UW480<br>UW484<br>UW500<br>UW504 |
