# Supplementary material
Source: PubMed Central journal article supplement (PMC4038962)
Supplement: NIHMS148691-supplement-04.pdf [file NIHMS148691-supplement-04.pdf]

**A**

## Biased Cosmopolitan incompatibilities

| Group I  |          |          |          |         |          |           | Group III |           |           |         |          |          |           |           |
|----------|----------|----------|----------|---------|----------|-----------|-----------|-----------|-----------|---------|----------|----------|-----------|-----------|
| 38-3     | ATRU03   | GT7      | GTC A28  | GTCN16  | GTLI21   | GTM253-17 | ATSP1-A   | ATSP1-B   | ATSP1-C   | ATSP1-D | ATSW01-1 | SP4B5-2  | SP4B6-2   | SP4E3-1   |
| GT7      | ATSP1-A  | 38-3     | 38-3     | GT7     | GT7      | ATSP1-A   | 38-3      | GT7       | 38-3      | ATRU03  | 38-3     | 38-3     | GTM253-17 | 38-3      |
| GTC A28  | ATSP1-C  | GTCN16   | GTLI21   | GTLI21  | GTC A28  | ATSP1-B   | ATRU03    | GTM253-17 | ATRU03    | GTC A28 | ATRU03   | ATRU03   | ATSP1-A   | GT7       |
| ATSP1-A  | ATSP1-D  | GTLI21   | ATSP1-A  | ATSP1-A | GTCN16   | ATSP1-C   | GT7       | ATSP1-A   | GT7       | GTLI21  | GT7      | GT7      | ATSP1-B   | GTC A28   |
| ATSP1-C  | ATSW01-1 | ATSP1-A  | ATSP1-D  | ATSP1-C | ATSP1-A  | SP4B6-2   | GTC A28   | ATSP1-C   | GTCN16    | ATSP1-A | GTC A28  | GTC A28  |           | GTCN16    |
| ATSW01-1 | SP4B5-2  | ATSP1-B  | ATSW01-1 | SP4E3-1 | ATSP1-C  | SP4E3-1   | GTCN16    | ATSP1-D   | GTLI21    | ATSP1-B | GTLI21   | ATSP1-B  |           | GTLI21    |
| SP4B5-2  |          | ATSP1-C  | SP4B5-2  |         | ATSP1-D  |           | GTLI21    | SP4B5-2   | GTM253-17 | ATSP1-C | ATSP1-C  | ATSP1-A  |           | GTM253-17 |
| SP4E3-1  |          | ATSW01-1 | SP4E3-1  |         | ATSW01-1 |           | GTM253-17 | SP4B6-2   | SP4B6-2   | ATSP1-A | ATSW01-1 | ATSP1-D  | ATSP1-B   | ATSP1-A   |
|          |          | SP4B5-2  |          |         | SP4B5-2  |           | ATSP1-B   | SP4E3-1   | ATSP1-B   | SP4E3-1 | SP4B5-2  | ATSP1-C  | ATSP1-C   | ATSP1-B   |
|          |          | SP4E3-1  |          |         | SP4E3-1  |           | ATSP1-C   |           | ATSP1-D   |         | SP4E3-1  | ATSW01-1 | ATSW01-1  | ATSP1-C   |
|          |          |          |          |         |          |           | ATSP1-D   |           | ATSW01-1  |         |          |          |           | ATSP1-D   |
|          |          |          |          |         |          |           | SP4B5-2   |           | SP4B5-2   |         |          |          |           | ATSW01-1  |
|          |          |          |          |         |          |           | SP4B6-2   |           | SP4B6-2   |         |          |          |           |           |
|          |          |          |          |         |          |           | SP4E3-1   |           | SP4E3-1   |         |          |          |           |           |

**B**

## Biased Cosmopolitan segregation by all incompatibilities

| A        | B        | C                 | D                  | E       |
|----------|----------|-------------------|--------------------|---------|
| 38-3     | ATRU03   | GTCN16            | GTM253-17          | GTC A28 |
| SP4B5-2  | ATSP1-D  | GTLI21<br>SP4E3-1 | ATSP1-B<br>SP4B6-2 |         |
| ATSP1-A  |          | ATSP1-A           | ATSP1-A            |         |
| ATSP1-C  | ATSP1-C  | ATSP1-C           |                    |         |
| ATSW01-1 | ATSW01-1 |                   |                    |         |
| GT7      |          | GT7               |                    |         |

**C**

## Biased Cosmopolitan Group I only segregation

| A    | B      | C      | D         | E       |
|------|--------|--------|-----------|---------|
| 38-3 | ATRU03 | GTCN16 | GTM253-17 | GTC A28 |
|      |        | GTLI21 |           |         |
| GT7  |        | GT7    |           |         |

**D**

## Biased Cosmopolitan Group III only segregation

| A        | B                  | C       |
|----------|--------------------|---------|
| SP4B5-2  | ATSP1-D<br>SP4E3-1 | SP4B6-2 |
| ATSP1-A  | ATSP1-B            | ATSP1-A |
| ATSP1-B  | ATSP1-B            | ATSP1-B |
| ATSP1-C  | ATSP1-C            |         |
| ATSW01-1 | ATSW01-1           |         |

**E**

## Biased Belfast Group I only incompatibilities

| UW462 | UW465 | UW466 | UW468 | UW473 | UW500 |
|-------|-------|-------|-------|-------|-------|
| UW468 | UW468 | UW473 | UW462 | UW466 | UW462 |
| UW500 |       | UW500 | UW465 | UW500 | UW466 |
|       |       |       | UW500 |       | UW468 |
|       |       |       |       |       | UW473 |

**F**

## Biased Belfast Group I only segregation

| A     | B     | C     | D     |
|-------|-------|-------|-------|
| UW462 | UW465 | UW466 | UW455 |
|       |       | UW473 | UW456 |
|       |       |       | UW464 |
|       |       |       | UW485 |
|       |       |       | UW499 |
| UW468 | UW468 |       |       |
|       | UW500 | UW500 |       |
