# Supplementary material
Source: PubMed Central journal article supplement (PMC4038962)

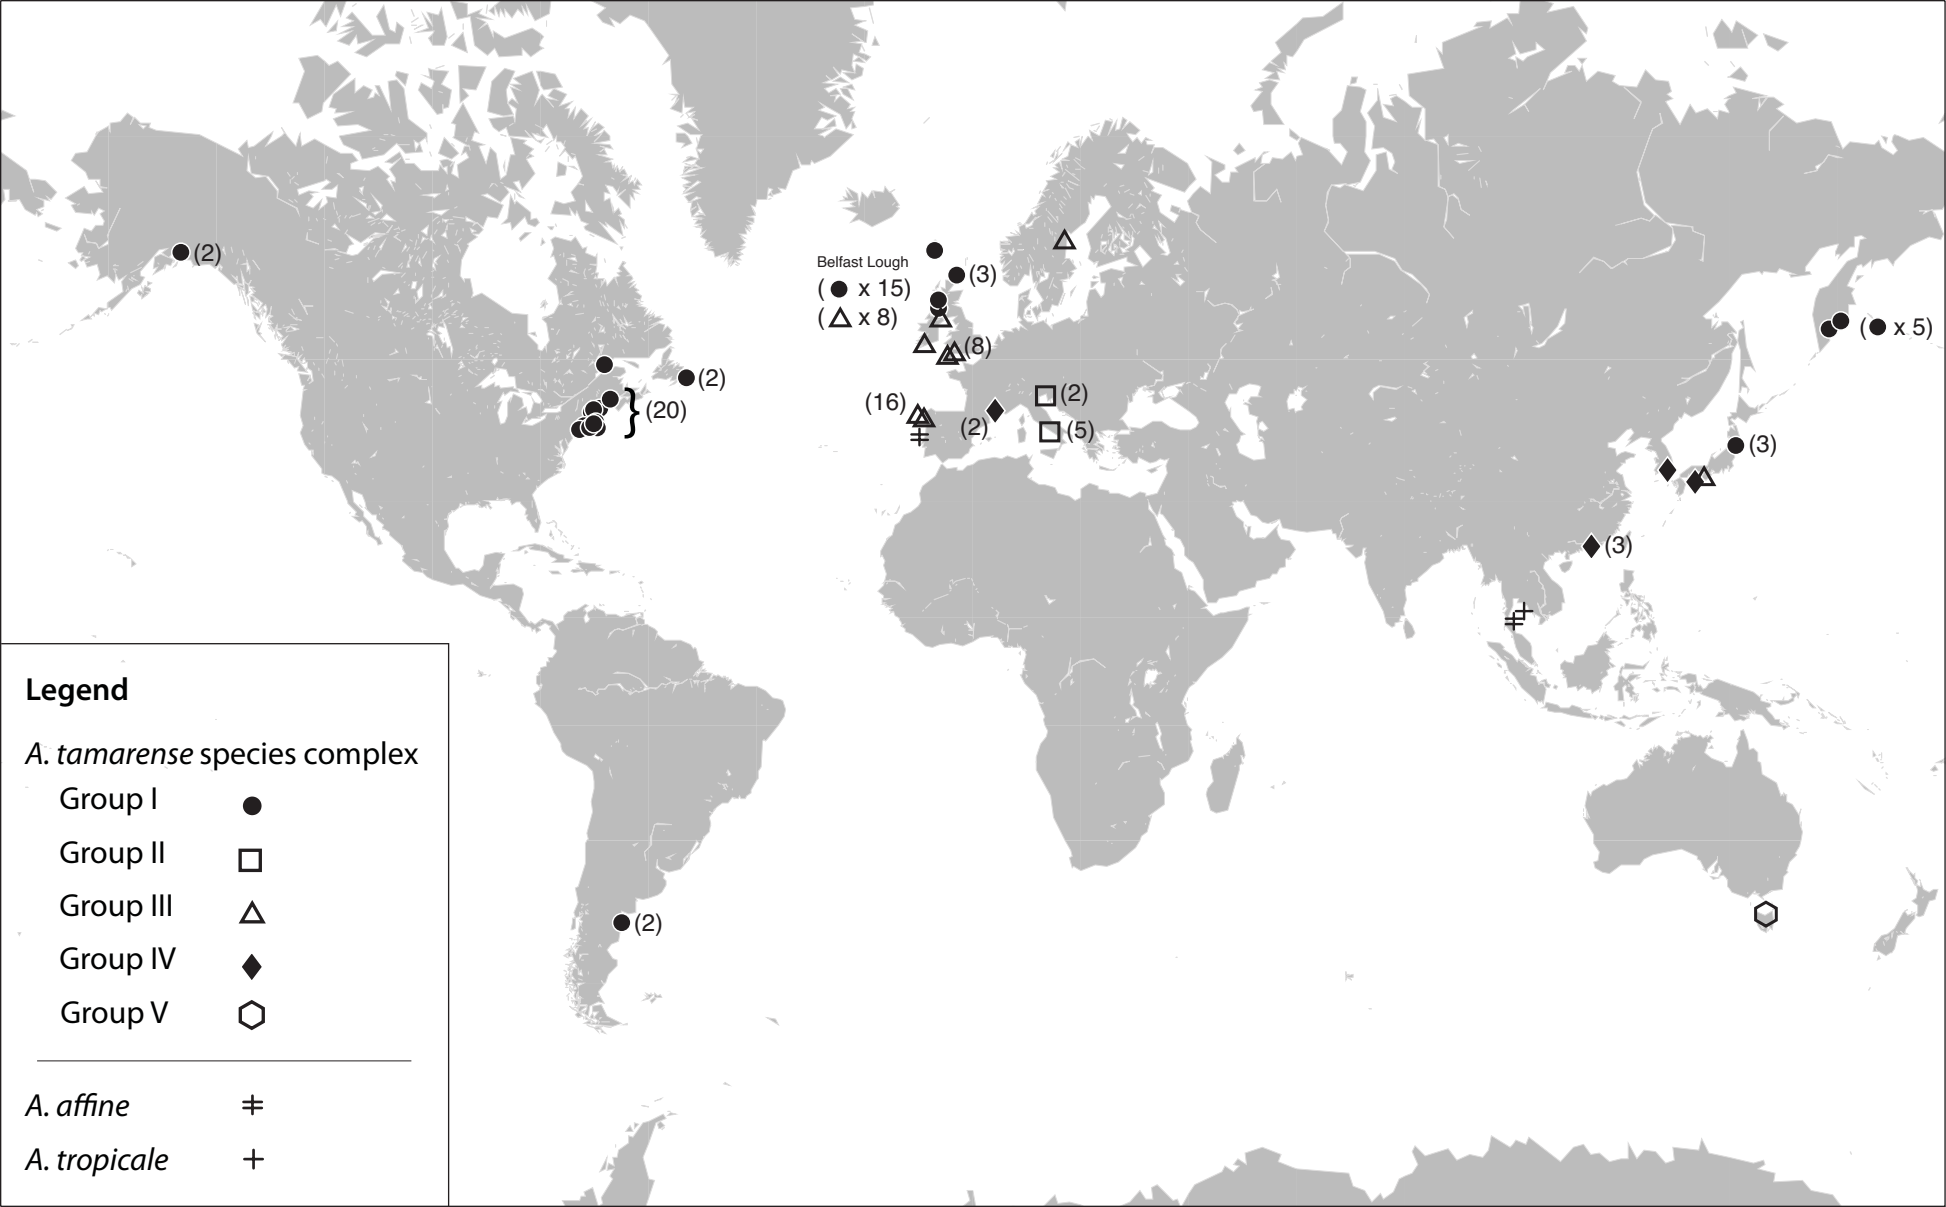

● (2)

Belfast Lough  
 (● x 15)  
 (△ x 8)

● (3)

△ (8)

● (x 5)

● (2)

● (20)

(16)

◆ (2)

□ (2)

□ (5)

● (3)

◆ (3)

● (2)

○

*A. affine* ≠

*A. tropicale* +

Supplement: NIHMS148691-supplement-01.pdf [file NIHMS148691-supplement-01.pdf]
